# Supplementary material
Source: PubMed Central journal article supplement (PMC4249555)
Supplement: AAC.03974-14_zac012143457so1.pdf [file AAC.03974-14_zac012143457so1.pdf]

**Supplemental table 1.** Antibiotic susceptibility for all ESBL and non-ESBL strains used as determined on Vitek 2 automated system

| <b>ANTIBIOTIC</b>           | <b>E16</b> | <b>E10</b> | <b>E 94</b> | <b>9189</b> | <b>9142</b> | <b>BRA</b> |
|-----------------------------|------------|------------|-------------|-------------|-------------|------------|
| Amikacin                    | S          | S          | S           | S           | S           | S          |
| Amoxicillin/Clavulanic acid | S          | S          | R           | S           | S           | S          |
| Ampicillin                  | R          | R          | R           | S           | S           | S          |
| Cefalothin                  | R          | R          | R           | S           | S           | S          |
| Cefaclor                    | R          | R          | R           | S           | S           | S          |
| Cefotaxime                  | R          | R          | R           | S           | S           | S          |
| Cefoxitin                   | S          | S          | S           | S           | S           | S          |
| Ceftazidime                 | R          | R          | R           | S           | S           | S          |
| Ciprofloxacin               | S          | S          | R           | S           | S           | S          |
| Gentamicin                  | S          | S          | S           | S           | S           | S          |
| Imipenem                    | S          | S          | S           | S           | S           | S          |
| Ticarcillin/Clavulanic acid | S          | R          | R           | S           | S           | S          |

**E16, E10, E94:** ESBL clinical strains

**9189, 9142, BRA:** non-ESBL clinical strains

**S:** sensitive

**R:** resistant

**Supplemental table 2.** Number of kidneys with histopathological alterations at the 1<sup>st</sup>, 2<sup>nd</sup>, 6<sup>th</sup> post-infection (PI) day. Mice infected with ESBL strain E94 (n=21) and non-ESBL producing strain BRA (n=21) remained without antibiotic treatment (3<sup>rd</sup> experiment), whereas others infected with ESBL strain E94 (n=22) and non-ESBL producing strain BRA (n=22) were treated with ceftriaxone (4<sup>th</sup> experiment). Grades of histopathological alterations are defined in Methods.

|                | No treatment         |             |                | Ceftriaxone treatment |                      |                |
|----------------|----------------------|-------------|----------------|-----------------------|----------------------|----------------|
|                | ESBL                 | Non-ESBL    | <i>P</i> value | ESBL                  | Non-ESBL             | <i>P</i> value |
| Grade          | 0/1/2/3/4/5          | 0/1/2/3/4/5 |                | 0/1/2/3/4/5           | 0/1/2/3/4/5          |                |
| PI Day 1       | 2/ <b>8</b> /2/0/2/0 | 2/4/4/2/2/0 | 0.246          | 0/2/3/ <b>3</b> /4/2  | 1/5/ <b>9</b> /1/0/0 | <b>0.009</b>   |
| PI Day 2       | 3/4/6/1/0/0          | 1/6/5/2/0/0 | 0.635          | 0/5/4/3/1/1           | 1/4/4/4/1/0          | 0.839          |
| PI Day 6       | 3/6/0/5/0/0          | 3/7/0/2/1/1 | 0.982          | 0/3/6/3/2/0           | 4/7/3/0/0/0          | <b>0.000</b>   |
| <i>P</i> value | 0.945                | 0.554       |                | 0.270                 | <b>0.002</b>         |                |

Median scores were rounded up.

Bold face number indicates  $P < 0.05$

Histopathological evaluation results were analyzed by non-parametric Kruskal-Wallis test followed by Mann-Whitney-U test to reveal the source of the differences.
